# Supplementary material
Source: Research Square preprint supplement (doi:10.21203/rs.3.rs-10381177/v1)
Supplement: Supplementary file 1 [file d441b9ee8ed3c5bdb730c209.docx]

**Submission FILE 7: SUPPLEMENTARY DATA**

# **Supplementary Table S1. Complete DEG list from GSE20966 (adj. p < 0.05, |log2FC| ≥ 1)**

| **Gene Symbol** | **log2FC** | **adj. p-value** | **Direction** | **Gene Title** |
| --- | --- | --- | --- | --- |
| PCOLCE2 | +3.20 | 0.017 | Upregulated | Procollagen C-endopeptidase enhancer 2 |
| SERPINA3 | +3.12 | 0.028 | Upregulated | Serpin family A member 3 (inflammation) |
| SLC2A2 | −1.86 | 0.021 | Downregulated | Solute carrier family 2 member 2 (GLUT2) |
| IGFBP3 | −1.14 | 0.024 | Downregulated | Insulin-like growth factor binding protein 3 |
| WNT6 | −1.64 | 0.018 | Downregulated | Wnt family member 6 |
| DCBLD2 | −1.74 | 0.049 | Downregulated | Discoidin CUB and LCCL domain containing 2 |
| SYT1 | +1.56 | 0.045 | Upregulated | Synaptotagmin 1 (vesicle exocytosis) |
| MDFIC | +1.62 | 0.008 | Upregulated | MyoD family inhibitor domain containing |
| ... | ... | ... | ... | ... (full list available in supplementary data files) |

# **Supplementary Table S2. Complete DEG list from GSE25724 (adj. p < 0.05, |log2FC| ≥ 1)**

Total: 1,526 annotated DEGs (78 upregulated, 1,448 downregulated). Top 10 shown:

| **Gene Symbol** | **log2FC** | **adj. p-value** | **Direction** | **Gene Title** |
| --- | --- | --- | --- | --- |
| IAPP | −3.55 | 0.010 | Downregulated | Islet amyloid polypeptide |
| PCSK1 | −3.48 | 0.011 | Downregulated | Proprotein convertase subtilisin/kexin type 1 |
| CPE | −2.84 | 0.016 | Downregulated | Carboxypeptidase E |
| INS | −1.05 | 0.041 | Downregulated | Insulin |
| SOX4 | +1.83 | 0.015 | Upregulated | SRY-box transcription factor 4 |
| ... | ... | ... | ... | ... (full list available in supplementary data files) |

# **Supplementary Table S3. Complete DEG list from GSE41762 (adj. p < 0.05)**

| **Gene Symbol** | **log2FC** | **adj. p-value** | **Direction** | **Gene Title** |
| --- | --- | --- | --- | --- |
| SLC2A2 | −1.08 | 0.007 | Downregulated | Solute carrier family 2 member 2 (GLUT2) |
| GLP1R | −0.72 | 0.021 | Downregulated | Glucagon-like peptide-1 receptor |
| IAPP | −0.68 | 0.018 | Downregulated | Islet amyloid polypeptide |
| ERO1B | −0.65 | 0.024 | Downregulated | Endoplasmic reticulum oxidoreductase 1 beta |
| PGC | +1.40 | 0.021 | Upregulated | Progastricsin (pepsinogen C) |

# **Supplementary Table S4. All 17 high-confidence STRING PPI interactions (confidence ≥ 0.700)**

| **Protein 1** | **Protein 2** | **Combined Score** | **Evidence Notes** |
| --- | --- | --- | --- |
| INS | IGFBP3 | 0.995 | Experimental + Database |
| INS | IAPP | 0.984 | Experimental + Database |
| INS | CPE | 0.943 | Experimental + Database |
| INS | SLC2A2 | 0.942 | Database + Co-expression |
| INS | PCSK1 | 0.911 | Experimental + Database |
| INS | GLP1R | 0.903 | Experimental + Database |
| CPE | PCSK1 | 0.894 | Experimental + Database |
| GLP1R | IAPP | 0.796 | Database + Text-mining |
| CALM3 | CALM2 | 0.999 | Experimental + Co-expression |
| CALM3 | CALM1 | 0.999 | Experimental + Co-expression |
| CALM2 | CALM1 | 0.999 | Experimental + Co-expression |
| INS | CALM3 | 0.742 | Database + Text-mining |
| INS | SCG2 | 0.762 | Database + Co-expression |
| INS | FGFR1 | 0.731 | Database + Text-mining |
| INS | SOX9 | 0.721 | Database |
| INS | IRF7 | 0.712 | Co-expression |
| INS | IFITM1 | 0.706 | Co-expression |

# **Supplementary Table S5. All 25 FDA-approved antidiabetic compounds screened**

| **Drug Name** | **Drug Class** | **MW (Da)** | **LogP** | **Best Target Affinity (kcal/mol)** |
| --- | --- | --- | --- | --- |
| Glimepiride | Sulfonylurea (3rd gen) | 531.67 | 3.21 | −11.2 (GLP1R) |
| Linagliptin | DPP-4 inhibitor | 505.53 | 2.46 | −9.5 (GLP1R) |
| Pioglitazone | Thiazolidinedione | 343.42 | 1.94 | −6.9 (CALM3) |
| Sitagliptin (benchmark) | DPP-4 inhibitor | 407.31 | 2.51 | −9.9 (GLP1R) |
| Empagliflozin (benchmark) | SGLT2 inhibitor | 327.80 | 1.72 | −9.7 (GLP1R) |
| Metformin (benchmark) | Biguanide | 129.16 | -0.75 | −8.3 (GLP1R) |
| Dapagliflozin | SGLT2 inhibitor | 408.88 | 2.44 | −8.5 (GLP1R) |
| Glipizide | Sulfonylurea (2nd gen) | 445.54 | 2.12 | −9.8 (GLP1R) |
| Glyburide | Sulfonylurea (2nd gen) | 494.01 | 2.98 | −10.1 (GLP1R) |
| Alogliptin | DPP-4 inhibitor | 339.43 | 1.50 | −8.2 (GLP1R) |
| Vildagliptin | DPP-4 inhibitor | 303.40 | 0.88 | −7.9 (GLP1R) |
| Teneligliptin | DPP-4 inhibitor | 426.57 | 1.72 | −8.8 (GLP1R) |
| Evogliptin | DPP-4 inhibitor | 354.48 | 1.85 | −8.1 (GLP1R) |
| Ertugliflozin | SGLT2 inhibitor | 437.93 | 2.05 | −8.3 (GLP1R) |
| Bexagliflozin | SGLT2 inhibitor | 454.94 | 2.18 | −8.6 (GLP1R) |
| Ipragliflozin | SGLT2 inhibitor | 404.87 | 2.35 | −8.0 (GLP1R) |
| Sotagliflozin | SGLT2 inhibitor | 425.92 | 2.28 | −7.9 (GLP1R) |
| Repaglinide | Meglitinide | 452.60 | 4.01 | −8.9 (GLP1R) |
| Nateglinide | Meglitinide | 317.43 | 2.62 | −7.5 (GLP1R) |
| Miglitol | Alpha-glucosidase inhibitor | 207.23 | -2.21 | −5.8 (CPE) |
| Tolbutamide | Sulfonylurea (1st gen) | 270.35 | 1.60 | −7.3 (CALM3) |
| Tolazamide | Sulfonylurea (1st gen) | 311.40 | 1.22 | −7.1 (CALM3) |
| Acetohexamide | Sulfonylurea (1st gen) | 324.40 | 1.80 | −7.5 (CALM3) |
| Chlorpropamide | Sulfonylurea (1st gen) | 276.74 | 1.55 | −6.9 (CALM3) |
| Dextrose | Glucose supplement | 180.16 | -3.20 | −5.2 (CPE) |
