# Supplementary material
Source: Research Square preprint supplement (doi:10.21203/rs.3.rs-10381177/v1)
Supplement: Supplementary file 2 [file de7b44287b73065c49be7105.docx]

**Submission FILE 4: TABLES**

**Table 1. Summary of differential gene expression analysis across three GEO datasets.**

| **Dataset** | **Platform** | **T2DM / Control** | **Total Probes** | **Annotated DEGs** | **Upregulated** | **Downregulated** |
| --- | --- | --- | --- | --- | --- | --- |
| GSE20966 | Affymetrix X3P (GPL1352) | 10 / 10 | 60,953 | 24 | 11 | 13 |
| GSE25724 | Affymetrix HG-U133A (GPL96) | 6 / 7 | 22,283 | 1,526 | 78 | 1,448 |
| GSE41762 | Affymetrix HuGene | 20 / 57 | 28,730 | 18 | 6 | 12 |

*DEGs: differentially expressed genes; T2DM: type 2 diabetes mellitus; adj. p < 0.05, |log2FC| ≥ 1 for GSE20966 and GSE25724; adj. p < 0.05 for GSE41762.*

**Table 2. Top 10 KEGG pathways enriched in the 27-gene T2DM DEG list (Enrichr KEGG 2026 Human).**

| **Pathway** | **Overlap** | **adj. p-value** | **Key Hub Genes** |
| --- | --- | --- | --- |
| RAS Signalling Pathway | 6/231 | 6.0×10⁻⁵ | CALM1/2/3, RASGRP1, INS, FGFR1 |
| Maturity Onset Diabetes of the Young | 3/25 | 1.8×10⁻⁴ | SLC2A2, IAPP, INS |
| cAMP Signalling Pathway | 5/222 | 1.8×10⁻⁴ | GLP1R, CALM1/2/3, SOX9 |
| Glucagon Signalling Pathway | 4/104 | 1.8×10⁻⁴ | SLC2A2, CALM1/2/3 |
| Insulin Signalling Pathway | 4/137 | 4.1×10⁻⁴ | CALM1/2/3, INS |
| Insulin Secretion | 3/81 | 9.3×10⁻⁴ | GLP1R, SLC2A2, INS |
| mTOR Signalling Pathway | 3/154 | 3.2×10⁻³ | WNT6, LAMTOR4, INS |
| Type I Diabetes Mellitus | 2/42 | 4.0×10⁻³ | CPE, INS |
| Type II Diabetes Mellitus | 2/47 | 4.8×10⁻³ | SLC2A2, INS |
| Insulin Resistance | 2/107 | 1.9×10⁻² | SLC2A2, INS |

**Table 3. Hub gene topology metrics from CytoHubba analysis (STRING v12.0, confidence ≥ 0.700).**

| **Hub Gene** | **Rank (MCC)** | **Degree** | **MCC** | **EPC** | **Betweenness** | **Expression in T2DM** |
| --- | --- | --- | --- | --- | --- | --- |
| INS | 1 | 9 | 11 | 16.26 | 118.0 | Downregulated |
| CPE | 2 | 3 | 4 | 5.27 | 22.0 | Downregulated |
| CALM3 | 3 | 3 | 4 | 5.32 | 40.0 | Downregulated |
| CALM2 | 4 | 2 | 3 | 3.80 | 0.0 | Downregulated |
| GLP1R | 5 | 2 | 3 | 3.40 | 0.0 | Downregulated |

*MCC: Maximum Clique Centrality; EPC: Edge Percolated Component; INS: Insulin; CPE: Carboxypeptidase E; CALM3: Calmodulin 3; CALM2: Calmodulin 2; GLP1R: Glucagon-like peptide-1 receptor.*

**Table 4. Molecular docking binding affinities (kcal/mol) of top candidates versus benchmark drugs against GLP1R, CALM3, and CPE.**

| **Drug** | **Drug Class** | **GLP1R** | **CALM3** | **CPE** | **Best Affinity** | **Status** |
| --- | --- | --- | --- | --- | --- | --- |
| Glimepiride | Sulfonylurea | −11.2 | −8.3 | −7.7 | −11.2 | Candidate |
| Linagliptin | DPP-4 inhibitor | −9.5 | −7.4 | −7.7 | −9.5 | Candidate |
| Pioglitazone | Thiazolidinedione | N/A | −6.9 | N/A | −6.9 | Candidate |
| Sitagliptin | DPP-4 inhibitor | −9.9 | −7.1 | −6.7 | −9.9 | Benchmark |
| Empagliflozin | SGLT2 inhibitor | −9.7 | −6.8 | −6.5 | −9.7 | Benchmark |
| Metformin | Biguanide | −8.3 | −6.3 | −6.3 | −8.3 | Benchmark |

*Docking performed using CB-Dock2 with AutoDock Vina. N/A = no significant docking cavity identified for this drug-target pair.*

**Table 5. SwissADME ADMET profiling of top drug candidates and benchmark drugs.**

| **Drug** | **MW (Da)** | **LogP** | **HBD** | **HBA** | **TPSA (Å²)** | **GI Absorption** | **Lipinski** | **Bioavailability** |
| --- | --- | --- | --- | --- | --- | --- | --- | --- |
| Glimepiride | 531.67 | 3.21 | 3 | 5 | 141.75 | Low | 1 violation | ~100% |
| Linagliptin | 505.53 | 2.46 | 0 | 6 | 109.60 | High | 1 violation | ~30% |
| Pioglitazone | 343.42 | 1.94 | 1 | 4 | 93.59 | High | PASS | ~83% |
| Metformin | 129.16 | -0.75 | 4 | 2 | 88.99 | High | PASS | ~50% |
| Sitagliptin | 407.31 | 2.51 | 1 | 10 | 77.04 | High | PASS | ~87% |
| Empagliflozin | 327.80 | 1.72 | 2 | 4 | 62.16 | High | PASS | ~78% |

*MW: molecular weight; LogP: lipophilicity; HBD: hydrogen bond donors; HBA: hydrogen bond acceptors; TPSA: topological polar surface area; GI: gastrointestinal; Lipinski: Rule of Five compliance.*
